# Supplementary material for: Classification of pediatric soft and bone sarcomas using DNA methylation-based profiling
Source: PubMed Central journal article supplement — BMC Cancer. 2024 Nov 20;24:1428. doi: 10.1186/s12885-024-13159-9 (PMC11577672; doi:10.1186/s12885-024-13159-9), 2024-11-20
Supplement: 12885_2024_13159_MOESM1_ESM.pdf [file 12885_2024_13159_MOESM1_ESM.pdf]

A. Case: SARC\_51 Histology: *BCOR*-rearranged sarcoma  
Molecular: *BCOR*-rearranged sarcoma (Calibrated score: 1.0)

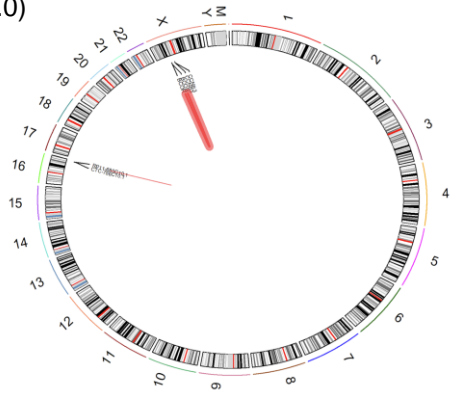

B. Case: SARC\_30 Histology: Ewing sarcoma  
Molecular: Ewing sarcoma (Calibrated score: 0.99)

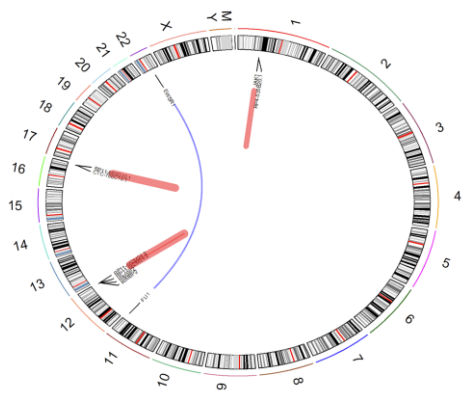

C. Case: SARC\_36 Histology: Ewing sarcoma  
Molecular: Ewing sarcoma (Calibrated score: 1.0)

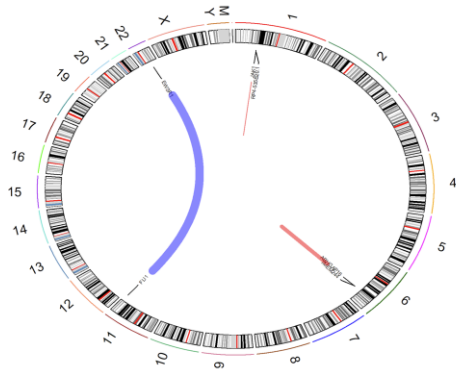

D. Case: SARC\_99 Histology: Ewing sarcoma  
Molecular: Ewing sarcoma (Calibrated score: 1.0)

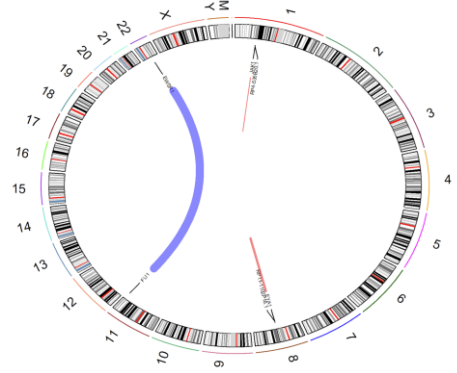

F. Case: SARC\_102 Histology: Ewing sarcoma  
Molecular: Ewing sarcoma (Calibrated score: 1.0)

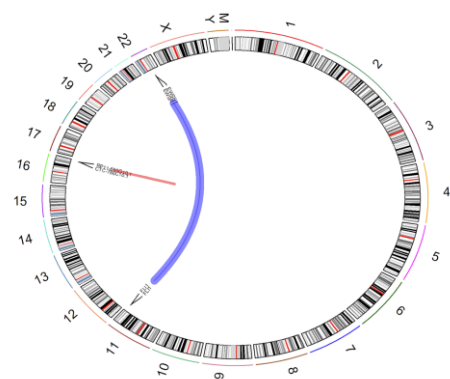

G. Case: SARC\_06 Histology: Ewing sarcoma  
Molecular: Ewing sarcoma (Calibrated score: 1.0)

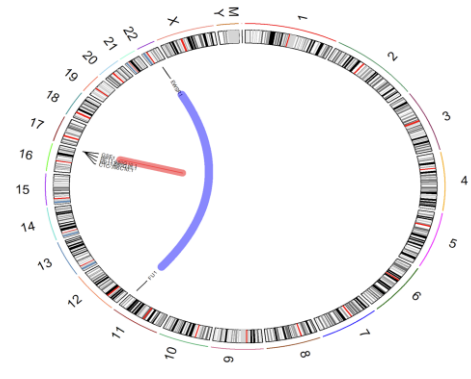

H. Case: SARC\_50 Histology: Ewing sarcoma  
Molecular: Ewing sarcoma (Calibrated score: 0.97)

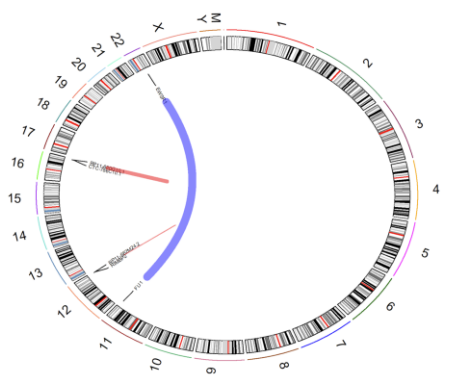

I. Case: SARC\_08 Histology: Ewing sarcoma  
Molecular: Ewing sarcoma (Calibrated score: 1.0)

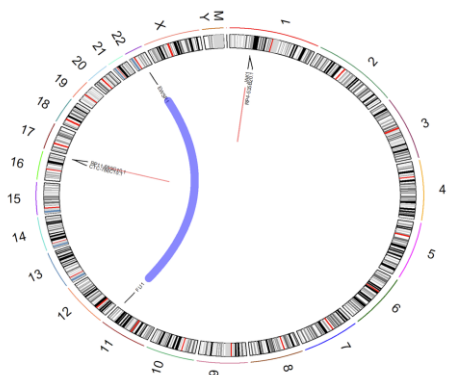

J. Case: SARC\_110 Histology: Primitive neuroectodermal tumor  
Molecular: Ewing sarcoma (Calibrated score: 1.0)

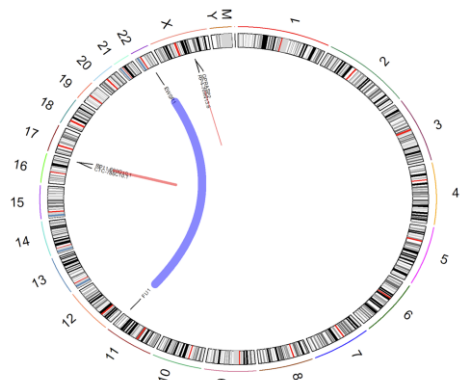

K. Case: SARC\_09 Histology: Kidney clear cell sarcoma  
Molecular: SBRCT\_ *BCOR* (Calibrated score: 1.0)

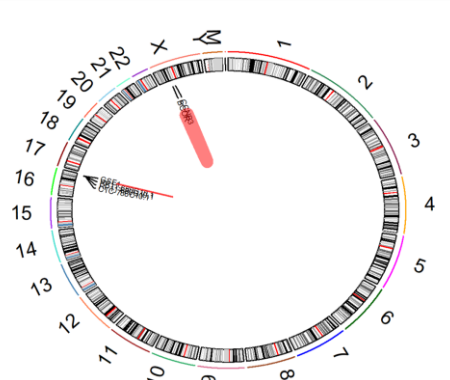

L. Case: Case: SARC\_11 Histology: Small round blue cells sarcoma

Molecular: *CIC*-rearranged sarcoma (Calibrated score: 0.93)

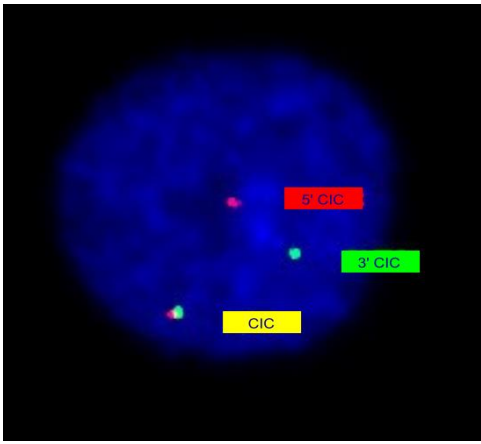

M. Case: SARC\_43 Histology: Spindle cell sarcoma

Molecular: *BCOR*-rearranged sarcoma (Calibrated score: 1.0)

Sex: Male

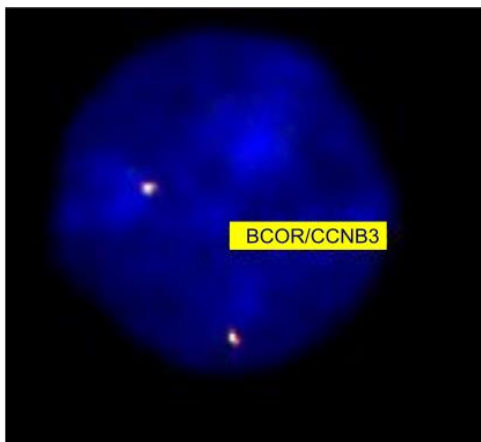

**Figure S1.** Circos plots (A-K) showing fusion genes detected in RNA sequencing. All chromosomes with cytoband information, Fusion events as links between locations in chromosomes (with gene names), Red links indicate intrachromosomal fusions, while blue links indicate interchromosomal fusions, widths of each link varies according to how many reads support the fusion event. (L-M) Fluorescence in situ hybridization showing *CIC* or *BCOR* rearrangements (obtained from institutional medical records). L. The break-apart probe type revealed the *CIC* rearrangement (ZytoLight SPEC *CIC* Dual Color Break Apart Probe, ZytoVision, cat# Z-2285-50). M. A paracentric inversion on the X chromosome involving *BCOR* (Xp11.4) and *CCNB3* (Xp11.22) was observed (Cytocell myProbes, cat# MPP14810)
